# Supplementary material
Source: Springer Nature journal article supplement (https://www.springermedizin.de/resource/supplementary/12887_2010_346_MOESM7_ESM.pdf/9474898)

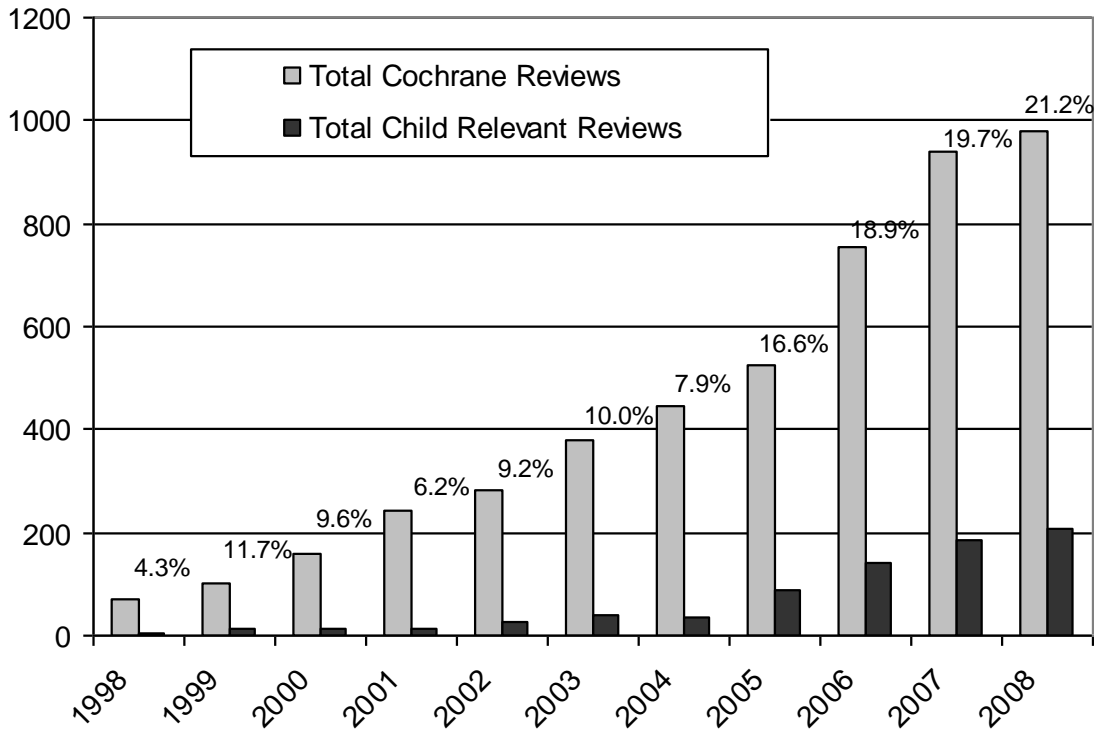

Supplement: MOESM7 [file 9474898]
